# Supplementary material
Source: PubMed Central journal article supplement (PMC4555738)
Supplement: ijcep0008-8402-f5.pdf [file ijcep0008-8402-f5.pdf]

## LncRNA profiles and atrial fibrillation

**Table S1.** Dysregulated lncRNAs

| Regulation | lncRNA            | chromosome | P value   | Fold-change |
|------------|-------------------|------------|-----------|-------------|
| Up         | uc003fck.2        | 3          | 0.013523  | 2.377431    |
| Up         | TCONS_I2_00013381 | 19         | 0.031293  | 5.256815    |
| Up         | ENST00000475015   | 20         | 0.00519   | 2.000688    |
| Up         | TCONS_00008505    | 4          | 0.014314  | 2.017542    |
| Up         | TCONS_00011196    | 6          | 6.51E-04  | 3.61868     |
| Up         | BC064139          | 1          | 0.00525   | 2.243105    |
| Up         | TCONS_I2_00022009 | 4          | 0.001906  | 2.063116    |
| Up         | ENST00000425309   | 9          | 0.008011  | 2.083121    |
| Up         | ENST00000575612   | 16         | 0.006468  | 2.567037    |
| Up         | TCONS_I2_00012515 | 19         | 0.030841  | 11.30257    |
| Up         | ENST00000420855   | 9          | 0.016404  | 2.312226    |
| Up         | uc004aci.1        | 9          | 0.032028  | 2.512922    |
| Up         | Hs.503862         | 11         | 0.026293  | 2.06983     |
| Up         | TCONS_I2_00013986 | 2          | 0.022132  | 4.854023    |
| Up         | ENST00000514597   | 5          | 0.013423  | 2.307491    |
| Up         | uc001eqh.1        | 1          | 0.007943  | 3.021855    |
| Up         | TCONS_00018023    | 10         | 0.010606  | 2.016543    |
| Up         | ENST00000428391   | 1          | 0.022275  | 2.30722     |
| Up         | NR_028394         | 1          | 3.65E-04  | 2.081824    |
| Up         | Hs.179213         | 6          | 6.01E-04  | 5.428494    |
| Up         | ENST00000438770   | 19         | 0.011794  | 6.470062    |
| Up         | TCONS_00004683    | 2          | 0.00878   | 4.803873    |
| Up         | TCONS_I2_00012517 | 19         | 0.01274   | 8.335881    |
| Up         | ENST00000437523   | 1          | 0.005258  | 5.795223    |
| Up         | TCONS_I2_00021324 | 4          | 0.003171  | 2.234285    |
| Up         | ENST00000500112   | 8          | 0.023753  | 4.734306    |
| Up         | uc001ejc.2        | 1          | 0.018671  | 2.896544    |
| Up         | TCONS_I2_00013073 | 19         | 0.0303766 | 6.904775    |
| Down       | U09078            | 2          | 0.012843  | 18.91045    |
| Down       | uc003zln.1        | 9          | 0.022142  | 2.0324073   |
| Down       | NR_033661         | 22         | 0.038443  | 12.6638775  |
| Down       | X72487            | 2          | 0.027988  | 17.514482   |
| Down       | ENST00000418467   | 6          | 0.022097  | 2.8098085   |
| Down       | CR597432          | 1          | 0.018466  | 2.701017    |
| Down       | X85157            | 2          | 0.027375  | 15.138224   |
| Down       | NR_047580         | 3          | 0.005083  | 2.0621066   |
| Down       | AK094275          | 12         | 0.014097  | 2.1594493   |
| Down       | uc.404+           | 16         | 0.024336  | 2.1976953   |
| Down       | TCONS_00006371    | 3          | 0.003962  | 3.7851977   |
| Down       | X72476            | 2          | 0.020292  | 14.41426    |
| Down       | AY671780          | 14         | 0.026094  | 25.72817    |
| Down       | uc010nwq.1        | Y          | 0.028504  | 2.0695264   |
| Down       | uc002gmz.2        | 17         | 0.010127  | 2.128647    |
| Down       | Z74666            | 2          | 0.026633  | 13.096844   |
| Down       | M55405            | 7          | 0.014525  | 3.5036204   |
| Down       | X72477            | 2          | 0.027652  | 19.180305   |
| Down       | ENST00000542489   | 12         | 0.017175  | 2.0399091   |
| Down       | X62960            | 14         | 0.03806   | 10.7720585  |
| Down       | X72444            | 2          | 0.024425  | 17.484407   |
| Down       | ENST00000553991   | 14         | 0.011772  | 2.0819178   |
